# Supplementary material
Source: PubMed Central journal article supplement (PMC6065094)
Supplement: ASN.2018020184SupplementaryData1.pdf [file ASN.2018020184SupplementaryData1.pdf]

## **C5b9 formation on endothelial cells reflect complement defects among patients with renal TMA and severe hypertension**

Sjoerd A.M.E.G. Timmermans, MD; Myrurgia A. Abdul-Hamid, MD; Judith Potjewijd, MD; Ruud O.M.F.I.H. Theunissen; Jan G.M.C. Damoiseaux, PhD; Chris P. Reutelingsperger, PhD; and Pieter van Paassen, MD, PhD; for the Limburg Renal Registry.

### **SUPPLEMENTAL CONTENTS**

|                                                                         |         |
|-------------------------------------------------------------------------|---------|
| <b>METHODS</b>                                                          | Page 2. |
| <b>Item S1.</b> Experimental design of ex vivo complement measurements. | Page 2. |
| <b>RESULTS</b>                                                          | Page 3. |
| <b>Item S2.</b> Baseline characteristics.                               | Page 3. |
| <b>Item S3.</b> Routine complement tests.                               | Page 4. |
| <b>Item S4.</b> Ex vivo C5b9 formation in disease controls.             | Page 5. |
| <b>Item S5.</b> Characteristics of the genetic complement defects.      | Page 6. |
| <b>Item S6.</b> Renal survival.                                         | Page 7. |
| <b>REFERENCES</b>                                                       | Page 8. |

## SUPPLEMENTAL METHODS

**Item S1.** Experimental design of ex vivo complement measurements.

ADP, adenosine 5'-diphosphate. DDD, dense deposit disease. Ecu, eculizumab treated samples. HC, healthy control. HTN-TMA, hypertension-associated TMA. HUS, hemolytic uremic syndrome.

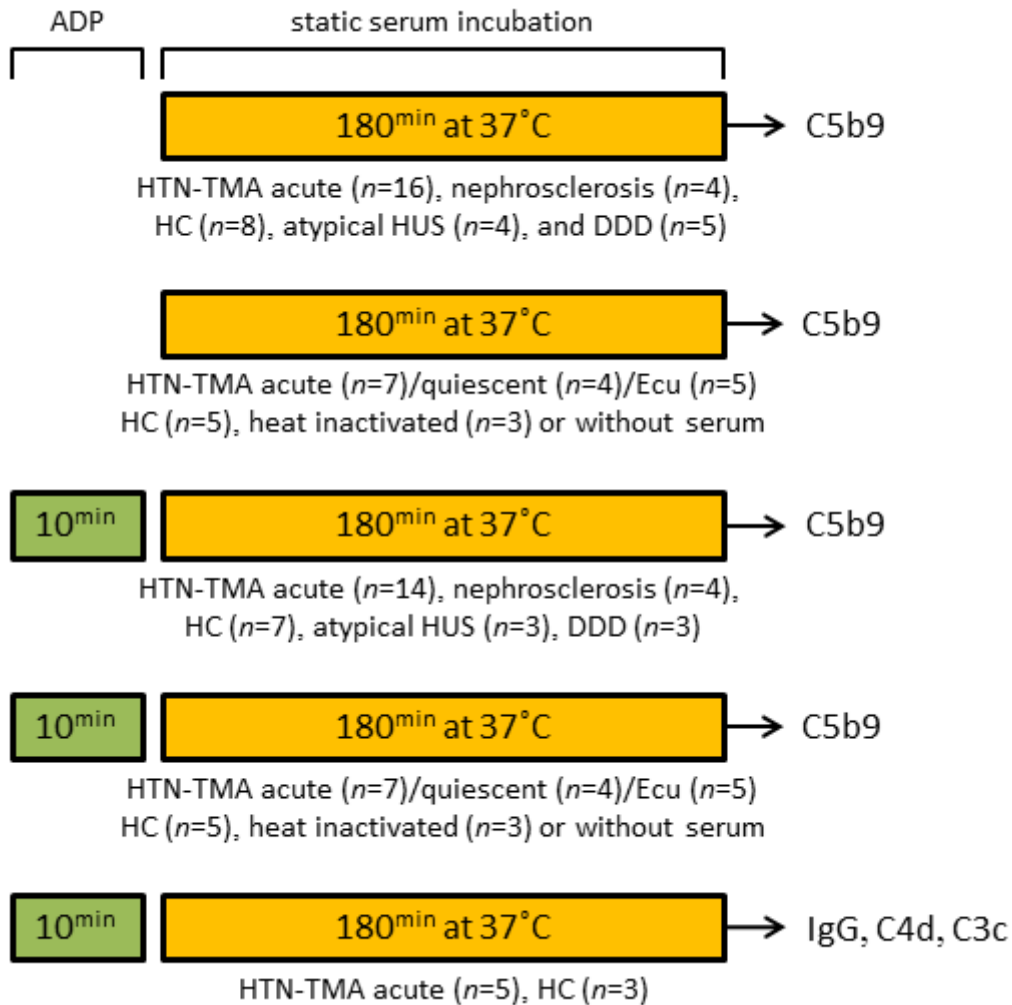

## SUPPLEMENTAL RESULTS

### Item S2. Baseline characteristics.

|                               | <b>TMA (n=17)</b> | <b>Nephrosclerosis (n=5)</b> | <b>P value</b> |
|-------------------------------|-------------------|------------------------------|----------------|
| M/F                           | 9/8               | 5/0                          | N/a            |
| Age, years                    | 38 (34 – 45)      | 63 (52 – 68)                 | 0.01           |
| SBP, mmHg                     | 212 (184 – 232)   | 185 (175 – 195)              | NS             |
| DBP, mmHg                     | 126 (120 – 142)   | 100 (80 – 123)               | 0.03           |
| Systemic hemolysis, %         | 5, 29             | 0                            | N/a            |
| Creatinine, $\mu\text{mol/L}$ | 835 (471 – 1,141) | 193 (122 – 521)              | 0.01           |
| Dialysis, %                   | 14, 82            | 0                            | N/a            |
| Proteinuria, g/d              | 1.6 (0.7 – 3.1)   | 2.1 (0.4 – 3.3)              | NS             |
| Low C4 (n/N)                  | 1/16              | 0/5                          | N/a            |
| Low C3 (n/N)                  | 5/16              | 0/5                          | N/a            |

DBP, diastolic blood pressure. N/a, not applicable. NS, not significant. SBP, systolic blood pressure. TMA, thrombotic microangiopathy.

**Item S3.** Routine complement tests. C4, C3, and sC5b9 levels do not differ between severely hypertensive patients with thrombotic microangiopathy and those with nephrosclerosis on renal biopsy.

C3G, C3 glomerulopathy. HTN-TMA, hypertension-associated TMA.

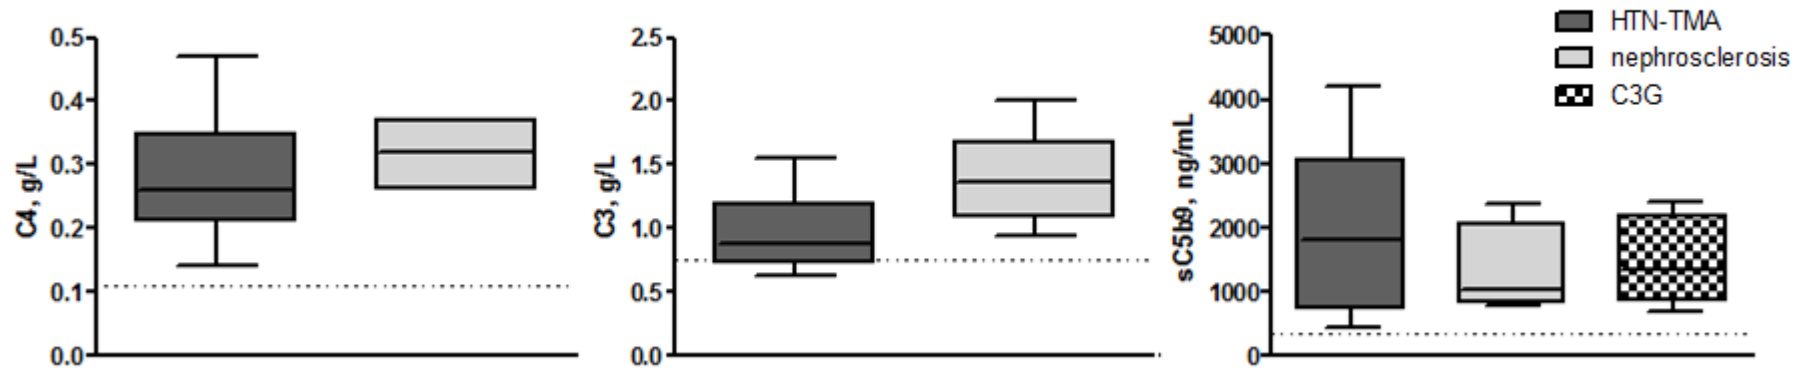

**Item S4.** Ex vivo C5b9 formation in disease controls. Absolute values in pixels and % of control of serum-induced C5b9 formation on resting and ADP-activated HMEC-1 in patients with atypical HUS and dense deposit disease.

|                                                                    | <b>C5b9 formation on resting HMEC-1</b> |                    |                  | <b>C5b9 formation on ADP-activated HMEC-1</b> |                    |                  |
|--------------------------------------------------------------------|-----------------------------------------|--------------------|------------------|-----------------------------------------------|--------------------|------------------|
|                                                                    | absolute value,<br>pixels               | control,<br>pixels | % of the control | absolute value,<br>pixels                     | control,<br>pixels | % of the control |
| <b>Atypical HUS, rare variants in complement genes and/or FHAA</b> |                                         |                    |                  |                                               |                    |                  |
| 1, DEAP-HUS                                                        | 34,148                                  | 10,349             | <b>330*</b>      | 25,412                                        | 7,843              | <b>324*</b>      |
| 2, C3-R161W                                                        | 27,170                                  | 9,918              | <b>274*</b>      | 34,514                                        | 13,019             | <b>265*</b>      |
| 3, C3-R161W, CFB-K565E                                             | 40,967                                  | 9,057              | <b>452*</b>      | 33,689                                        | 10,401             | <b>324*</b>      |
| 4, None                                                            | 17,237                                  | 4,707              | <b>366*</b>      | ND                                            | N/a                | N/a              |
| <b>Dense deposit disease</b>                                       |                                         |                    |                  |                                               |                    |                  |
| 1                                                                  | 5,531                                   | 4,707              | 118              | 4,026                                         | 4,945              | 81               |
| 2                                                                  | 4,970                                   | 4,707              | 106              | ND                                            | N/a                | N/a              |
| 3                                                                  | 7,543                                   | 12,551             | 60               | 9,704                                         | 5,872              | 165              |
| 4                                                                  | 15,719                                  | 12,551             | 125              | 7,940                                         | 5,872              | 135              |
| 5                                                                  | 9,202                                   | 12,551             | 73               | 9,390                                         | 5,872              | 160              |

DEAP, deficiency of plasma proteins and factor H autoantibody positive. FHAA, factor H autoantibody. HUS, hemolytic uremic syndrome. N/a, not applicable. ND, not determined. \**P* value <0.05.

**Item S5.** Characteristics of the genetic complement defects.

| No. | Mutation(s)                                            | Consequence         | MAF, %           | SIFT                     | PolyPhen2                   | Defect                                              |
|-----|--------------------------------------------------------|---------------------|------------------|--------------------------|-----------------------------|-----------------------------------------------------|
| 1   | None                                                   | N/a                 | N/a              | N/a                      | N/a                         | N/a                                                 |
| 2   | <i>CFI</i> c.148C>G<br><i>THBD</i> c.1433C>T           | P50A<br>T478I       | ≤0.01<br>0       | Deleterious<br>Tolerated | Probably damaging<br>Benign | Quantitative deficiency(1)<br>Not characterized     |
| 3   | None                                                   | N/a                 | N/a              | N/a                      | N/a                         | N/a                                                 |
| 4   | None                                                   | N/a                 | N/a              | N/a                      | N/a                         | N/a                                                 |
| 5   | None                                                   | N/a                 | N/a              | N/a                      | N/a                         | N/a                                                 |
| 6   | None                                                   | N/a                 | N/a              | N/a                      | N/a                         | N/a                                                 |
| 7   | None                                                   | N/a                 | N/a              | N/a                      | N/a                         | N/a                                                 |
| 8   | <i>C3</i> c.481C>T                                     | R161W               | 0                | Deleterious              | Probably damaging           | Gain of function(2)                                 |
| 9   | <i>CFI</i> c.452A>G                                    | N151S               | <0.01            | Deleterious              | Probably damaging           | Quantitative deficiency(1)                          |
| 10  | None                                                   | N/a                 | N/a              | N/a                      | N/a                         | N/a                                                 |
| 11  | <i>CFH</i> c.2558G>A                                   | C853Y               | 0                | Deleterious              | Probably damaging           | Not characterized                                   |
| 12  | <i>C3</i> c.481C>T                                     | R161W               | 0                | Deleterious              | Probably damaging           | Gain of function(2)                                 |
| 13  | <i>CD46</i> c.811_816delGAGACT<br><i>CFH</i> c.2850G>T | ΔD237/S238<br>Q950H | 0<br>0.36 – 0.44 | N/a.<br>Deleterious      | N/a.<br>Probably damaging   | Quantitative deficiency(3)<br>Functional defect?(4) |
| 14  | <i>C3</i> c.481C>T                                     | R161W               | 0                | Deleterious              | Probably damaging           | Gain of function(2)                                 |
| 15  | None                                                   | N/a                 | N/a              | N/a                      | N/a                         | N/a                                                 |
| 16  | <i>C3</i> c.481C>T                                     | R161W               | 0                | Deleterious              | Probably damaging           | Gain of function(2)                                 |
| 17  | None                                                   | N/a                 | N/a              | N/a                      | N/a                         | N/a                                                 |

MAF, minor allele frequency according to the Exome Variant Server (EVS, <http://evs.gs.washington.edu/EVS/>) and Exome Aggregation Consortium databases (ExAC, <http://exac.broadinstitute.org/>). N/a, not applicable. PolyPhen2, Polymorphism Phenotyping V2. SIFT, Sorting Intolerant From Tolerant.

**Item S6.** Renal survival. Kaplan Meier regarding the cumulative incidence of renal survival and/or recovery in eculizumab treated ( $n=5$ ) and treatment naive patients ( $n=12$ ).

Mo, months.

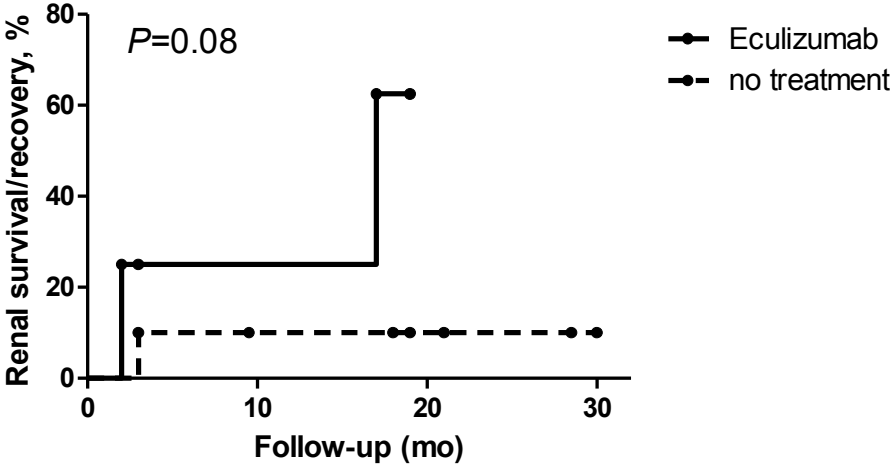

## References

1. Bienaime F, Dragon-Durey M-A, Regnier CH, Nilsson SC, Kwan WH, Blouin J, et al. Mutations in components of complement influence the outcome of Factor I-associated atypical hemolytic uremic syndrome. *KidneyInt.* 2010;77(4):339-49.
2. Roumenina LT, Frimat M, Miller EC, Provot F, Dragon-Durey MA, Bordereau P, et al. A prevalent C3 mutation in aHUS patients causes a direct C3 convertase gain of function. *Blood.* 2012;119(18):4182-91.
3. Richards A, Kemp EJ, Liszewski MK, Goodship JA, Lampe AK, Decorte R, et al. Mutations in human complement regulator, membrane cofactor protein (CD46), predispose to development of familial hemolytic uremic syndrome. *Proc Natl Acad Sci U S A.* 2003;100(22):12966-71.
4. Mohlin FC, Nilsson SC, Levart TK, Golubovic E, Rusai K, Muller-Sacherer T, et al. Functional characterization of two novel non-synonymous alterations in CD46 and a Q950H change in factor H found in atypical hemolytic uremic syndrome patients. *Mol Immunol.* 2015;65(2):367-76.
